# Supplementary material for: Demonstration of a Plasmonic Nonlinear Pseudodiode
Source: PubMed Central journal article supplement (PMC10141562; doi:10.1021/acs.nanolett.3c00367), 2023-04-12
Supplement: nl3c00367_si_001.pdf [file nl3c00367_si_001.pdf]

**Supporting Information for:**  
**Demonstration of a plasmonic nonlinear pseudo-diode**

Sergejs Boroviks,\* Andrei Kiselev, Karim Achouri, and Olivier J.F. Martin\*

*Nanophotonics and Metrology Laboratory, Swiss Federal Institute of Technology Lausanne  
(EPFL), Lausanne, Switzerland*

E-mail: sergejs.boroviks@epfl.ch; olivier.martin@epfl.ch

## References

- [S1] McPeak, K. M.; Jayanti, S. V.; Kress, S. J. P.; Meyer, S.; Iotti, S.; Rossinelli, A.; Norris, D. J. Plasmonic Films Can Easily Be Better: Rules and Recipes. *ACS Photonics* **2015**, *2*, 326–333.

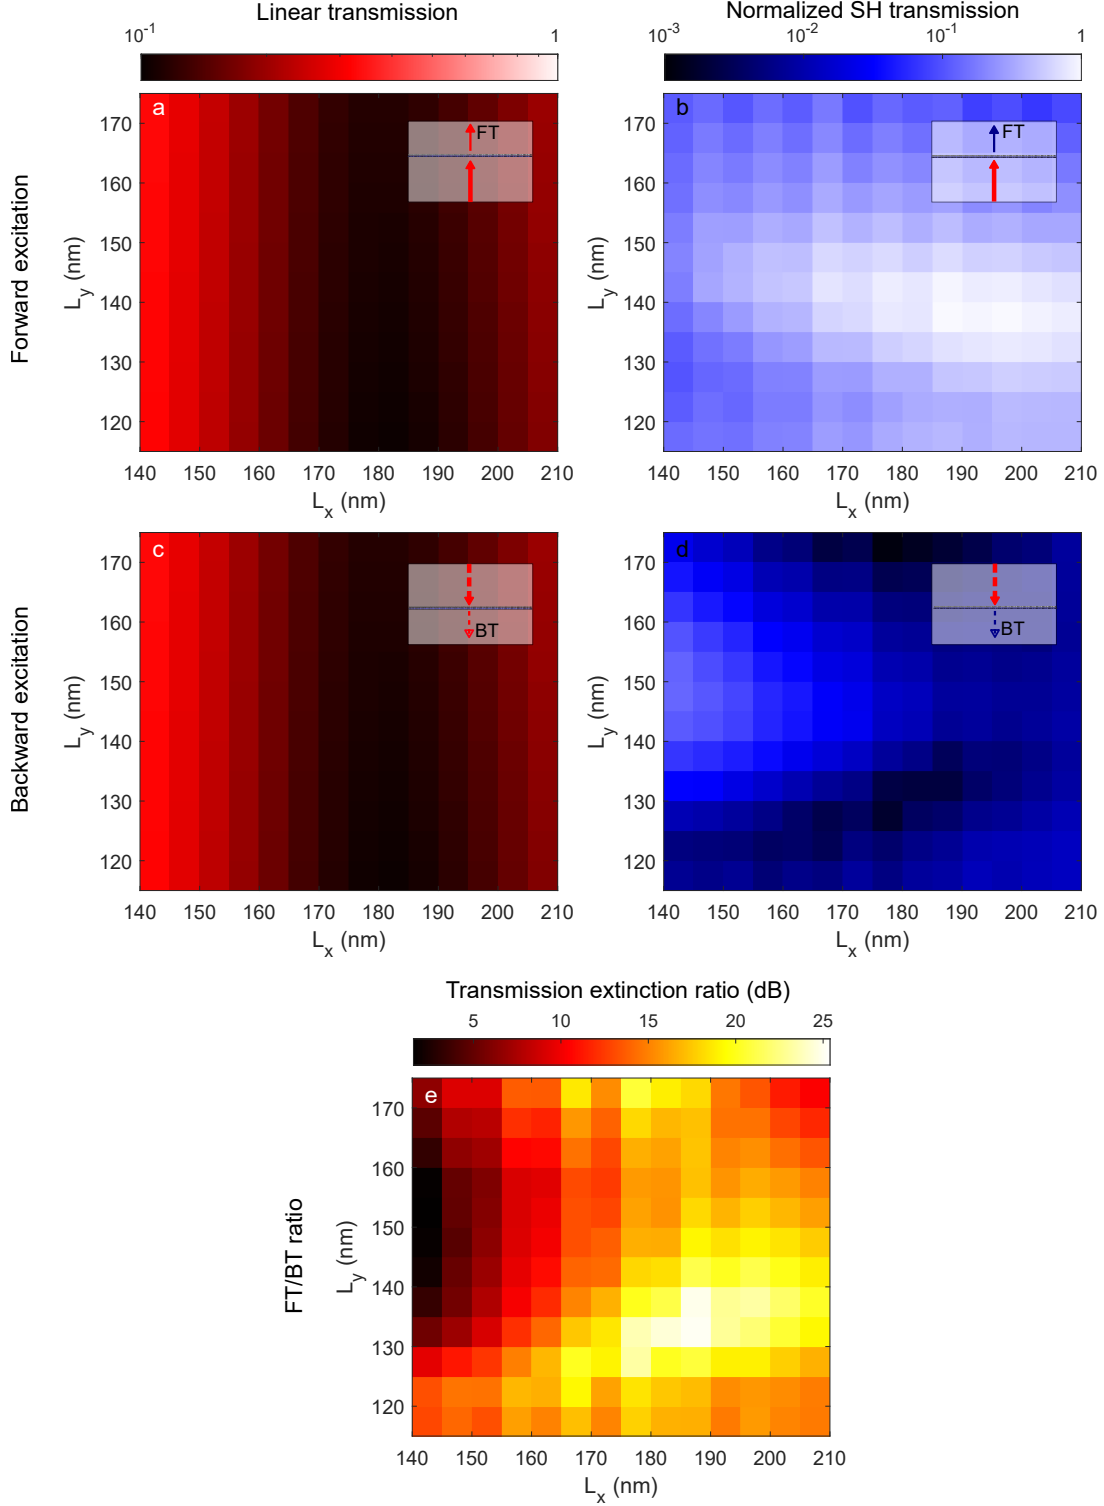

Figure S1: Control over linear and SH transmission via  $L_x$  and  $L_y$  geometrical parameters at excitation wavelength  $\lambda_0 = 800$  nm. Other parameters are fixed:  $D = t_{Ag} = t_{Al} = 50$  nm and  $L_s = 25$  nm. Simulated (a) linear and (b) SH transmission upon forward excitation; (c) linear and (d) SH transmission upon backward excitation. (e) Forward/backward-excitation SH transmission extinction ratio.

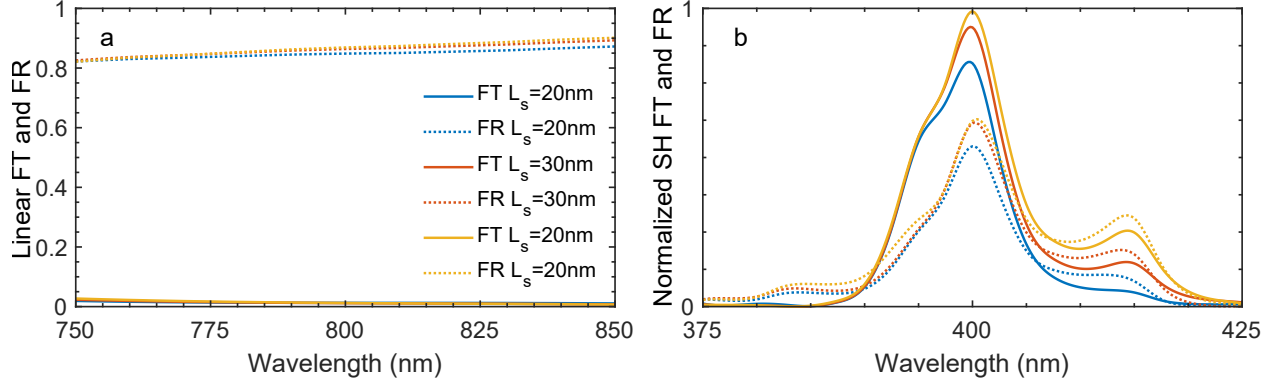

Figure S2: Simulated dependence of the linear and SH transmission and reflection upon forward excitaiton (FT and FR) on the geometrical parameters (a) Linear and (b) SH. Other geometrical parameters are fixed:  $L_x=135\text{ nm}$ ,  $L_y=195\text{ nm}$  and  $D=t_{\text{Ag}}=t_{\text{Al}}=50\text{ nm}$ .

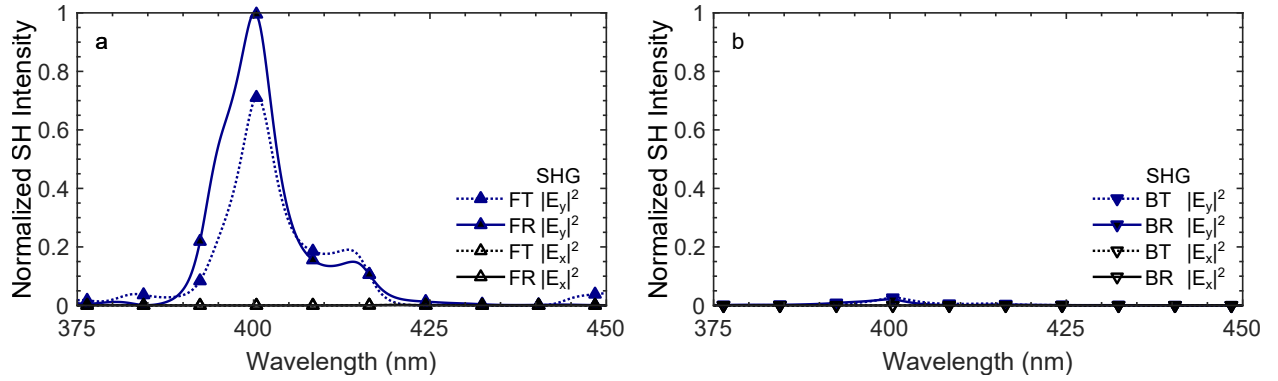

Figure S3: Electric field components extracted from the simulations of the reflected and transmitted SH waves. In both cases, (a) forward excitation (FE) and (b) backward excitation (BE) the  $E_y^{2\omega}$  component (that is orthogonal to the excitation field  $E_x^\omega$ ) is dominant.

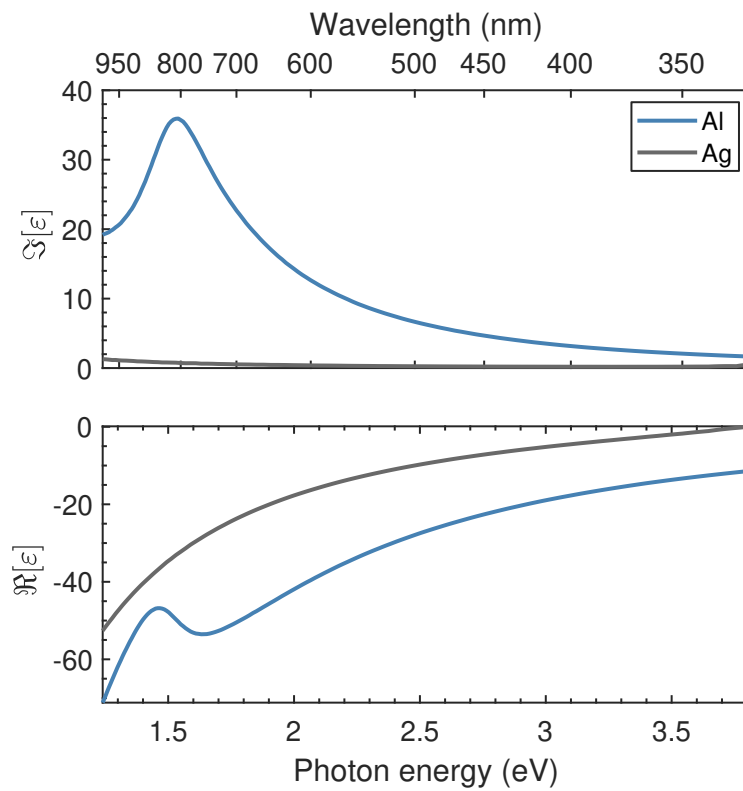

Figure S4: Dielectric permittivity of Al (blue lines) and Ag (gray lines) used in the simulations: real (bottom panel) and imaginary (top panel) parts of the interpolated experimental data from ref.<sup>S1</sup>

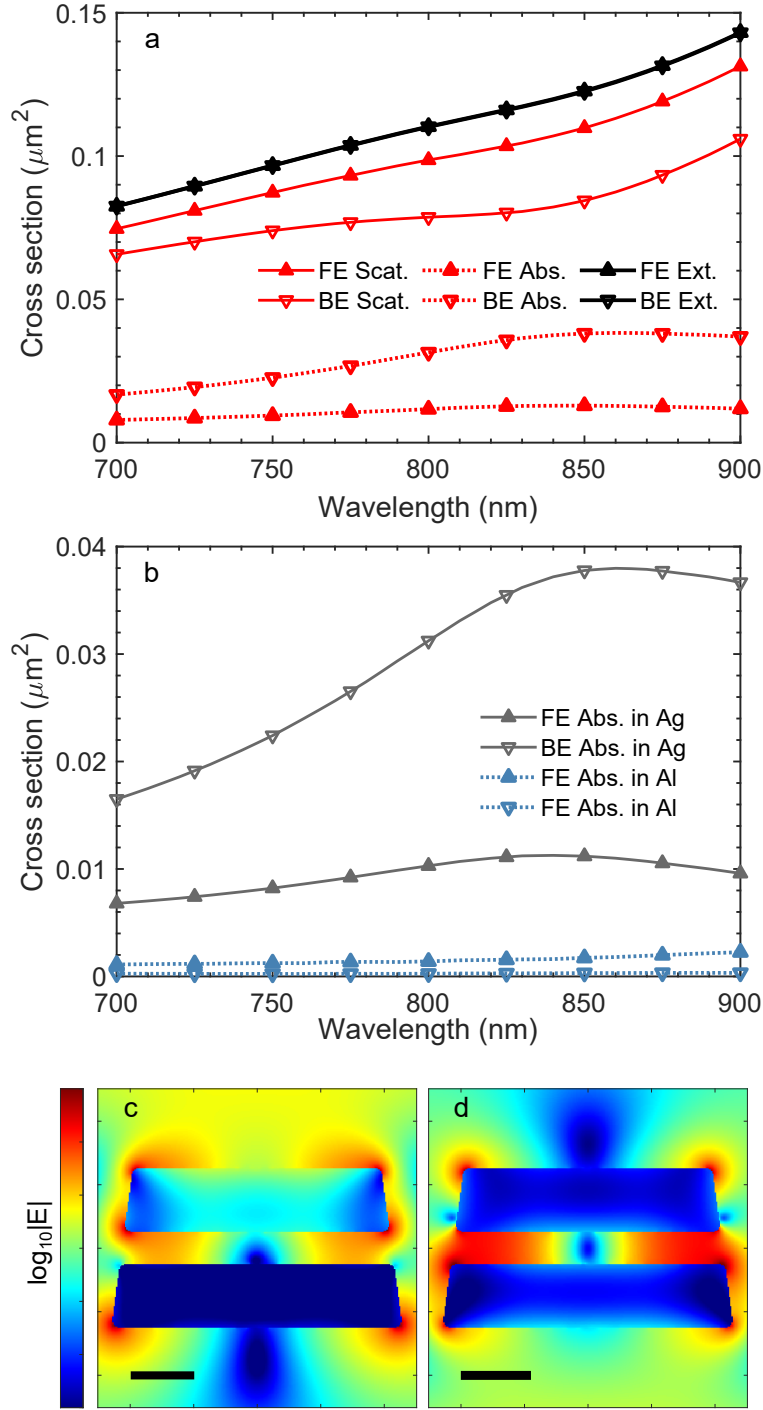

Figure S5: Simulations of isolated meta-atom linear scattering and absorption. (a) Scattering (red solid lines), absorption (red dotted lines) and extinction (black-solid lines) cross-sections upon forward excitation (upward triangles) and backward excitation (downward triangles); (b) absorption in Ag (gray solid lines) and Al (blue dotted lines) domains upon forward excitation (upward triangles) and backward excitation (downward triangles). Pseudo-color images of the normalized magnitude of the electric field distribution upon (c) forward and (d) backward excitations (logarithmic scale; scale bar: 50  $\mu\text{m}$ ).

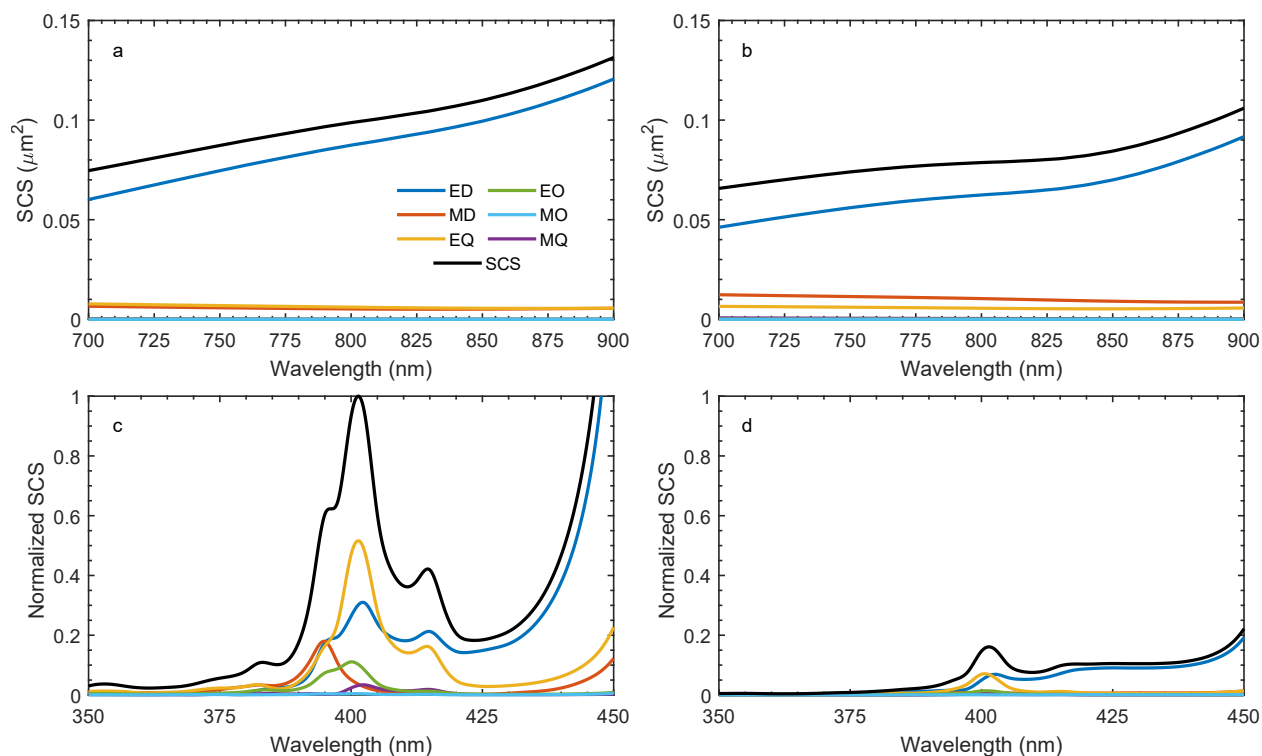

Figure S6: Isolated meta-atom multipole analysis (simulations). Vector spherical harmonic decomposition of (a) linear scattering upon forward excitation; (b) linear scattering upon backward excitation; (c) SHG scattering upon forward excitation; (d) SHG scattering upon backward excitation.

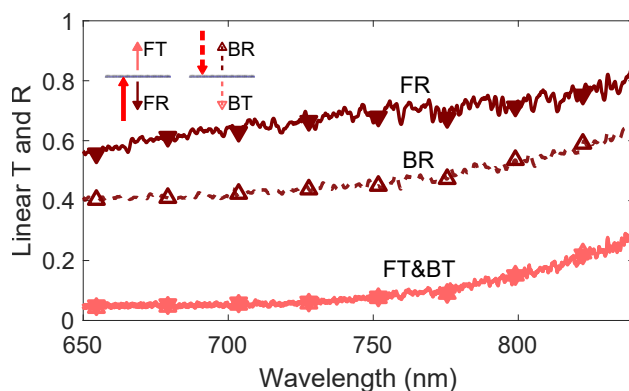

Figure S7: Experimental measurements of the linear transmission and reflection spectra upon forward (FT and FR) and backward (BT and BR) excitations, acquired under white light illumination (standard halogen lamp) with a 50:50 beamsplitter instead of a dichroic mirror.
